# Supplementary material for: Research progress on the antiviral activities of natural products and their derivatives: Structure–activity relationships
Source: PubMed Central journal article supplement (PMC9596788; doi:10.3389/fchem.2022.1005360), 2022-10-12
Supplement: Table1.pdf [file Table1.pdf]

Table 1 Natural products and their derivatives with antiviral activity

| Symbol | Type     | Compound                    | Structure                                                                             | Targets and effects                               | Source                                                                          | Ref.                    |
|--------|----------|-----------------------------|---------------------------------------------------------------------------------------|---------------------------------------------------|---------------------------------------------------------------------------------|-------------------------|
| 1A     | Alkaloid | Isatigotindiolediosides C   | 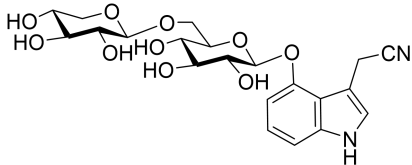    | Anti-coxsackie-B3<br>(IC <sub>50</sub> = 33.3 μM) | <i>Isatis indigotica</i><br>roots                                               | (Meng, et al.<br>2017b) |
| 2A     |          | Isatigotindiolediosides E   |     | Anti-coxsackie-B3<br>(IC <sub>50</sub> = 33.3 μM) | <i>Isatis indigotica</i><br>roots                                               | (Meng et al.,<br>2017b) |
| 3A     |          | Calanthoside                |     | Anti-coxsackie-B3<br>(IC <sub>50</sub> = 33.3 μM) | <i>Isatis indigotica</i><br>roots<br>green seaweed<br><i>Gayralia oxysperma</i> | (Meng et al.,<br>2017b) |
| 4A     |          | Isatibisindosulfonic acid B |  | Anti-coxsackie-B3<br>(IC <sub>50</sub> = 33.3 μM) | <i>Isatis indigotica</i><br>roots                                               | (Meng, et al.<br>2017a) |
| 5A     |          | Isatindosulfonic acid B.    |  | Anti-coxsackie-B3<br>(IC <sub>50</sub> = 33.3 μM) | <i>Isatis indigotica</i><br>roots                                               | (Meng, et al.<br>2017a) |

| Symbol | Type     | Compound                                                                                                    | Structure | Targets and effects                                     | Source                            | Ref.                |
|--------|----------|-------------------------------------------------------------------------------------------------------------|-----------|---------------------------------------------------------|-----------------------------------|---------------------|
| 6A     | Alkaloid | 2-(3-cyanomethyl-4-methoxy-1 <i>H</i> -indol-7-yl)-2-(1 <i>H</i> -indol-3-yl)acetonitrile                   |           | Anti-coxsackie-B3<br>(IC <sub>50</sub> = 3.70–12.35 μM) | <i>Isatis indigotica</i><br>roots | (Chen et al., 2012) |
| 7A     |          | (-)-(R)-2-(3-cyanomethyl-4-methoxy-1 <i>H</i> -indol-7-yl)-2-(4-methoxy-1 <i>H</i> -indol-3-yl)acetonitrile |           | Anti-Anti-H3N2<br>(IC <sub>50</sub> = 3.70–12.35 μM)    | <i>Isatis indigotica</i><br>roots | (Chen et al., 2012) |
| 8A     |          | (+)-(S)-2-{7-[1-(4-hydroxyphenyl)-ethyl]-4-methoxy-1 <i>H</i> -indol-3-yl}acetonitrile                      |           | Anti-Anti-H3N2<br>(IC <sub>50</sub> = 3.70–12.35 μM)    | <i>Isatis indigotica</i><br>roots | (Chen et al., 2012) |
| 9A     |          | arvelxin                                                                                                    |           | Anti-Anti-H3N2<br>(IC <sub>50</sub> = 3.70–12.35 μM)    | <i>Isatis indigotica</i><br>roots | (Chen et al., 2012) |
| 10A    |          | (±)-2-(2-Oxoindolin-3-yl)acetamide                                                                          |           | Anti-coxsackie-B3<br>(IC <sub>50</sub> = 6.87 μM)       | <i>Isatis indigotica</i><br>roots | (Chen et al., 2012) |

| Symbol | Type     | Compound             | Structure                                                                             | Targets and effects                                                                        | Source                                        | Ref.                                            |
|--------|----------|----------------------|---------------------------------------------------------------------------------------|--------------------------------------------------------------------------------------------|-----------------------------------------------|-------------------------------------------------|
| 11A    | Alkaloid | 17-nor-excelsinidine | 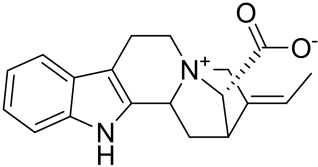    | Anti-Adv<br>(EC <sub>50</sub> = 0.94 μg/mL)<br>Anti-HSV<br>(EC <sub>50</sub> = 1.09 μg/mL) | <i>Alstonia scholaris</i>                     | (Zhang et al., 2014)                            |
| 12A    |          | Caulerpin            |     | Anti-CHIKV<br>(EC <sub>50</sub> = 0.8 μg/mL)<br>Anti-HSV-1<br>(EC <sub>50</sub> = 1.29 μM) | Marine green alga<br><i>Caulerpa racemosa</i> | (Esteves et al., 2019)<br>(Macedo et al., 2012) |
| 13A    |          | Forsyqinlingine A    |     | Anti-H1N1 (IC <sub>50</sub> = 6.9 μM)<br>Anti-RSV (IC <sub>50</sub> = 5.0 μM)              | <i>Forsythia suspensa</i>                     | (Li et al., 2021)                               |
| 14A    |          | Forsyqinlingine B    |   | Anti-H1N1 (IC <sub>50</sub> = 7.7 μM)<br>Anti-RSV (IC <sub>50</sub> = 4.8 μM)              | <i>Forsythia suspensa</i>                     | (Li et al., 2021)                               |
| 15A    |          | Forsyqinlingine C    |  | Anti-H1N1<br>(IC <sub>50</sub> = 11.9 μM)<br>Anti-RSV (IC <sub>50</sub> = 13.5 μM)         | <i>Forsythia suspensa</i>                     | (Li et al., 2022)                               |

| Symbol | Type     | Compound          | Structure                                                                           | Targets and effects                                                                        | Source                                     | Ref.              |
|--------|----------|-------------------|-------------------------------------------------------------------------------------|--------------------------------------------------------------------------------------------|--------------------------------------------|-------------------|
| 16A    | Alkaloid | Forsyqinlingine D | 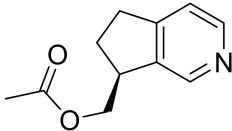 | Anti-H1N1<br>(IC <sub>50</sub> = 15.1 μM)<br>Anti-RSV (IC <sub>50</sub> = 14.0 μM)         | <i>Forsythia suspensa</i>                  | (Li et al., 2022) |
| 17A    |          | Lonijaposide O    |   | Anti-H3N2 (IC <sub>50</sub> = 11.6 μM)                                                     | Flower buds<br>of <i>Lonicera japonica</i> | (Yu et al., 2013) |
| 18A    |          | Lonijaposide R    |  | Anti-H3N2 (IC <sub>50</sub> = 6.8 μM)<br>Anti-coxsackie-B3<br>(IC <sub>50</sub> = 12.3 μM) | Flower buds<br>of <i>Lonicera japonica</i> | (Yu et al., 2013) |

| Symbol | Type     | Compound       | Structure                                                                             | Targets and effects                                       | Source                                     | Ref.                         |
|--------|----------|----------------|---------------------------------------------------------------------------------------|-----------------------------------------------------------|--------------------------------------------|------------------------------|
| 19A    | Alkaloid | Lonijaposide T | 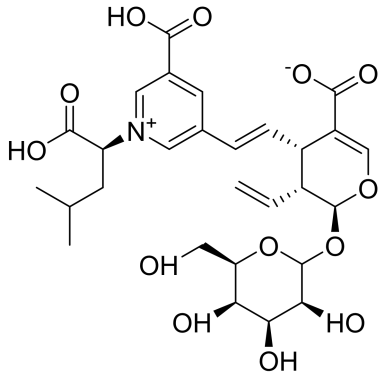    | Anti-H3N2 influenza virus<br>(IC <sub>50</sub> = 10.3 μM) | Flower buds<br>of <i>Lonicera japonica</i> | (Yu et al.,<br>2013)         |
| 20A    |          | Lonijaposide W |    | Anti-H3N2 influenza virus<br>(IC <sub>50</sub> = 8.2 μM)  | Flower buds<br>of <i>Lonicera japonica</i> | (Yu et al.,<br>2013)         |
| 21A    |          | (-)-cytisine   |  | Anti-influenza virus<br>(ED <sub>50</sub> = 109 μg/mL)    | <i>Spalathus linearis</i>                  | (Tsypysheva<br>et al., 2013) |

| Symbol | Type     | Compound                                                                              | Structure                                                                            | Targets and effects                                                                                 | Source                                     | Ref.                                                 |
|--------|----------|---------------------------------------------------------------------------------------|--------------------------------------------------------------------------------------|-----------------------------------------------------------------------------------------------------|--------------------------------------------|------------------------------------------------------|
| 22A    | Alkaloid | 11-(3-bromobenzoyl)-7,11-diazatricyclo[7.3.1.0 <sup>2,7</sup> ]trideca-2,4-dien-6-one | 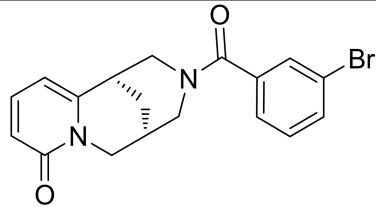   | Anti-influenza virus<br>(ED <sub>50</sub> = 44 µg/mL)                                               | <i>Spalathus linearis</i>                  | (Tsypysheva et al., 2013)                            |
| 23A    |          | <i>N</i> -(12-Methylcytisin-3-yl)- <i>N'</i> -phenylurea                              |    | Anti-influenza virus<br>(ED <sub>50</sub> = 57 µg/mL)                                               | <i>Spalathus linearis</i>                  | (Tsypysheva et al., 2013)                            |
| 24A    |          | Warifteine                                                                            |    | Anti-ZIKV<br>(IC <sub>50</sub> = 2.2 µg/mL)<br>Anti-Dengue virus<br>(IC <sub>50</sub> = 2.00 µg/mL) | <i>Cissampelos sympodialis</i><br>rhizomes | (da Silva et al., 2021a)<br>(da Silva et al., 2021b) |
| 25A    |          | Methylwarifteine                                                                      |   | Anti-ZIKV<br>(IC <sub>50</sub> = 3.5 µg/mL)                                                         | <i>Cissampelos sympodialis</i><br>rhizomes | (da Silva et al., 2021b)                             |
| 26A    |          | Dehydrocheilanthifoline                                                               |  | Anti-HBsAg<br>(IC <sub>50</sub> = 15.84 µM)<br>Anti-HBeAg<br>(IC <sub>50</sub> = 17.12 µM)          | <i>Coptidis Rhizoma</i>                    | (Zeng et al., 2013)                                  |

| Symbol | Type     | Compound                                | Structure                                                                             | Targets and effects                                      | Source                                    | Ref.                  |
|--------|----------|-----------------------------------------|---------------------------------------------------------------------------------------|----------------------------------------------------------|-------------------------------------------|-----------------------|
| 27A    | Alkaloid | (+)-12 $\alpha$ -hydroxysophocarpine    | 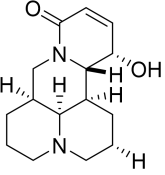   | Anti-H3N2<br>(IC <sub>50</sub> = 84.70 $\mu$ M)          | Rhizomes of<br><i>Sophora tonkinensis</i> | (Pan et al.,<br>2015) |
| 28A    |          | (-)-12 $\beta$ -hydroxy-sophocarpine    |    | Anti-H3N2<br>(IC <sub>50</sub> = 242.46 $\mu$ M)         | Rhizomes of<br><i>Sophora tonkinensis</i> | (Pan et al.,<br>2015) |
| 29A    |          | (+)-sophoramine                         |    | Anti-H3N2 (IC <sub>50</sub> = 63.07 $\mu$ M)             | Rhizomes of<br><i>Sophora tonkinensis</i> | (Pan et al.,<br>2015) |
| 30A    |          | (-)-12 $\beta$ -hydroxyoxy-sophocarpine |   | Anti-coxsackie-B3<br>(IC <sub>50</sub> = 26.62 $\mu$ M)  | Rhizomes of<br><i>Sophora tonkinensis</i> | (Pan et al.,<br>2015) |
| 31A    |          | (-)-9 $\alpha$ -hydroxysophocarpine     |  | Anti-coxsackie-B3<br>(IC <sub>50</sub> = 197.22 $\mu$ M) | Rhizomes of<br><i>Sophora tonkinensis</i> | (Pan et al.,<br>2015) |

| Symbol | Type     | Compound               | Structure                                                                            | Targets and effects                                                                                                                                  | Source                                    | Ref.                                            |
|--------|----------|------------------------|--------------------------------------------------------------------------------------|------------------------------------------------------------------------------------------------------------------------------------------------------|-------------------------------------------|-------------------------------------------------|
| 32A    | Alkaloid | (+)-sophoranol         | 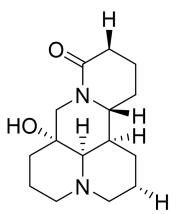  | Anti-coxsackie-B3<br>(IC <sub>50</sub> = 252.18 μM)                                                                                                  | Rhizomes of<br><i>Sophora tonkinensis</i> | (Pan et al.,<br>2015)                           |
| 33A    |          | (-)-14β-hydroxymatrine |   | Anti-coxsackie-B3<br>(IC <sub>50</sub> = 184.14 μM)                                                                                                  | Rhizomes of<br><i>Sophora tonkinensis</i> | (Pan et al.,<br>2015)                           |
| 34A    |          | Tylophorine B          |   | Anti-TMV (IC <sub>50</sub> = 2.4 nM)                                                                                                                 | <i>Cynanchum komarovii</i>                | (Xi et al.,<br>2006)                            |
| 35A    |          | Anisomycin             |  | Anti-ZIKV<br>(IC <sub>50</sub> = 7.9 ± 1.2 nM)<br>Anti-DENV-2<br>(IC <sub>50</sub> = 32.2±1.1 nM)<br>Anti-SARS-CoV-2<br>(IC <sub>50</sub> = 31.4 nM) | <i>Botrytis cinerea</i>                   | (Quintana et al., 2020)<br>(Huang et al., 2020) |



| Symbol | Type     | Compound                                                                                                | Structure                                                                           | Targets and effects                                                               | Source              | Ref.                     |
|--------|----------|---------------------------------------------------------------------------------------------------------|-------------------------------------------------------------------------------------|-----------------------------------------------------------------------------------|---------------------|--------------------------|
| 36A    | Alkaloid | Piperine                                                                                                | 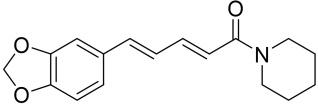  | Anti-HBsA (IC <sub>50</sub> = 0.15 mM)<br>Anti-HBeAg (IC <sub>50</sub> = 0.14 mM) | <i>Piper nigrum</i> | (Jiang et al., 2013)     |
| 37A    |          | 5-Bromo-3-[(3,5-dimethyl-phenyl)sulfonyl]-N-(pyrrolidin-1-ylmethyl)-1H-indole-2-carboxamide             |   | Anti-HIV-1 (IC <sub>50</sub> = 1.3 nM)                                            | Derivatives         | (La Regina et al., 2011) |
| 38A    |          | 5-Chloro-3-[[3-[(E)-2-cyanovinyl]-5-methyl-phenyl]-methoxy-phosphoryl]-1H-indole-2-carboxamide (IDX899) |   | Anti-HIV-1 (IC <sub>50</sub> = 0.34 μM)                                           | Derivatives         | (Dousson et al., 2016)   |
| 39A    |          | ethyl 5-bromo-3-(1-phenylcyclopropyl)-1H-indole-2-carboxylate                                           |  | Anti-HIV-1 (IC <sub>50</sub> = 0.066 μM)                                          | Derivatives         | (Hassam et al., 2012)    |

| Symbol | Type     | Compound                                                          | Structure                                                                            | Targets and effects                        | Source      | Ref.                   |
|--------|----------|-------------------------------------------------------------------|--------------------------------------------------------------------------------------|--------------------------------------------|-------------|------------------------|
| 40A    | Alkaloid | 5-chloro-3-(2-(4-fluorophenyl)-2-oxoethyl)-3-hydroxyindolin-2-one | 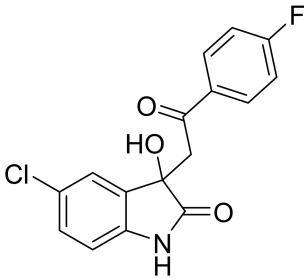   | Anti-HIV-1<br>(IC <sub>50</sub> = 5.92 μM) | Derivatives | (Chander et al., 2018) |
| 41A    |          | 5-bromo-3-hydroxy-3-(2-oxo-2-(m-tolyl)ethyl)indolin-2-one         |    | Anti-HIV-1<br>(IC <sub>50</sub> = 1.38 μM) | Derivatives | (Chander et al., 2018) |
| 42A    |          | 5-bromo-3-hydroxy-3-(2-(2-methoxyphenyl)-2-oxoethyl)indolin-2-one |   | Anti-HIV-1<br>(IC <sub>50</sub> = 0.82 μM) | Derivatives | (Chander et al., 2018) |
| 43A    |          | 5-bromo-3-(2-(2-chlorophenyl)-2-oxoethyl)-3-hydroxyindolin-2-one  |  | Anti-HIV-1<br>(IC <sub>50</sub> = 2.03 μM) | Derivatives | (Chander et al., 2018) |

| Symbol | Type     | Compound                                                              | Structure                                                                            | Targets and effects                                                                                                                 | Source                     | Ref.                          |
|--------|----------|-----------------------------------------------------------------------|--------------------------------------------------------------------------------------|-------------------------------------------------------------------------------------------------------------------------------------|----------------------------|-------------------------------|
| 44A    | Alkaloid | 5-chloro-3-(2-(2-chlorophenyl)-2-oxoethyl)-3-hydroxyindolin-2-one     | 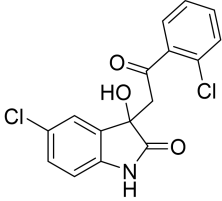  | Anti-HIV-1<br>(IC <sub>50</sub> = 0.76 μM)                                                                                          | Derivatives                | (Chander et al., 2018)        |
| 45A    |          | 5-chloro-3-(2-(3-chlorophenyl)-2-oxoethyl)-3-hydroxyindolin-2-one     |    | Anti-HIV-1<br>(IC <sub>50</sub> = 34.25 μM)                                                                                         | Derivatives                | (Chander et al., 2018)        |
| 46A    |          | 5-chloro-3-(2-(3,4-dichlorophenyl)-2-oxoethyl)-3-hydroxyindolin-2-one |   | Anti-HIV-1<br>(IC <sub>50</sub> = 68.86 μM)                                                                                         | Derivatives                | (Chander et al., 2018)        |
| 1Q     | Quinones | Zeylanone epoxide                                                     |  | Anti H1N1 influenza virus<br>(IC <sub>50</sub> = 0.65 ± 0.01 μM)<br>Anti H3N2 influenza virus<br>(IC <sub>50</sub> = 1.6 ± 0.09 μM) | <i>Diospyros anisandra</i> | (Cetina-Montejo et al., 2019) |

| Symbol | Type     | Compound            | Structure                                                                             | Targets and effects                        | Source                       | Ref.                          |
|--------|----------|---------------------|---------------------------------------------------------------------------------------|--------------------------------------------|------------------------------|-------------------------------|
| 2Q     | Quinones | Acetylshikonin (AS) | 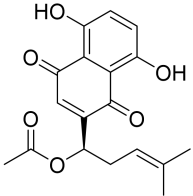   | Anti-CVA16<br>(EC <sub>50</sub> = 0.04 μM) | <i>Arnebiae Radix</i>        | (Liu et al., 2019b)           |
| 3Q     |          | Dicoumarol          |     | Anti-CHB<br>(EC <sub>50</sub> = 100 μM)    | <i>Trifolium</i>             | (Cheng et al., 2021b)         |
| 4Q     |          | Aloe-emodin         |     | Anti-HBV<br>(Inhibition: 83%)              | <i>Rhei Radix et Rhizoma</i> | (Parvez et al., 2019)         |
| 5Q     |          | Droserone           |   | Anti-H1N1<br>(IC <sub>50</sub> > 100 μM)   | Derivatives                  | (Cetina-Montejo et al., 2019) |
| 6Q     |          | Plumbagin           |  | Anti-H1N1<br>(IC <sub>50</sub> > 6.25 μM)  | Derivatives                  | (Cetina-Montejo et al., 2019) |

| Symbol | Type     | Compound                   | Structure                                                                             | Targets and effects                       | Source      | Ref.                          |
|--------|----------|----------------------------|---------------------------------------------------------------------------------------|-------------------------------------------|-------------|-------------------------------|
| 7Q     | Quinones | 2,3-epoxiplumbagin         | 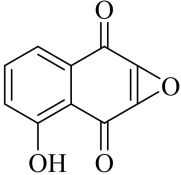   | Anti-H1N1<br>(IC <sub>50</sub> > 12.5 μM) | Derivatives | (Cetina-Montejo et al., 2019) |
| 8Q     |          | 3,3-biplumbagin            |     | Anti-H1N1<br>(IC <sub>50</sub> > 0.78 μM) | Derivatives | (Cetina-Montejo et al., 2019) |
| 9Q     |          | 1,4-dihydroxyanthraquinone |    | Anti-HCV (IC <sub>50</sub> = 54 μM)       | Derivatives | (Furuta et al., 2015)         |
| 10Q    |          | 1,2-dihydroxyanthraquinone |    | Anti-HCV (IC <sub>50</sub> > 200 μM)      | Derivatives | (Furuta et al., 2015)         |
| 11Q    |          | 1,5-dihydroxyanthraquinone |  | Anti-HCV (IC <sub>50</sub> > 200 μM)      | Derivatives | (Furuta et al., 2015)         |

| Symbol | Type     | Compound                          | Structure                                                                           | Targets and effects                | Source      | Ref.                      |
|--------|----------|-----------------------------------|-------------------------------------------------------------------------------------|------------------------------------|-------------|---------------------------|
| 12Q    | Quinones | 1,8-dihydroxyanthraquinone        | 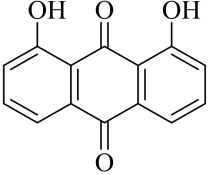 | Anti-HCV ( $IC_{50} > 200 \mu M$ ) | Derivatives | (Furuta et al., 2015)     |
| 13Q    |          | 1,4,5,8-tetrahydroxyanthraquinone |  | Anti-HCV ( $IC_{50} = 6 \mu M$ )   | Derivatives | (Frecentese et al., 2016) |
| 14Q    |          | 1,2,3-trihydroxyanthraquinone     |   | Anti-HCV ( $IC_{50} = 18 \mu M$ )  | Derivatives | (Frecentese et al., 2016) |
| 15Q    |          | 1,2,4-trihydroxyanthraquinone     |  | Anti-HCV ( $IC_{50} = 11 \mu M$ )  | Derivatives | (Frecentese et al., 2016) |

| Symbol | Type      | Compound                                                                                                                                                  | Structure                                                                            | Targets and effects                                                                                                                                | Source                         | Ref.                                                                       |
|--------|-----------|-----------------------------------------------------------------------------------------------------------------------------------------------------------|--------------------------------------------------------------------------------------|----------------------------------------------------------------------------------------------------------------------------------------------------|--------------------------------|----------------------------------------------------------------------------|
| 16Q    | Quinones  | Hypericin                                                                                                                                                 | 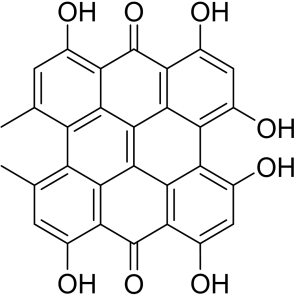   | Anti-HCV (IC <sub>50</sub> = 3 μM)                                                                                                                 | <i>Hypericum perforatum L.</i> | (Furuta et al., 2015)                                                      |
| 17Q    |           | Sennidin A                                                                                                                                                |    | Anti-HCV (IC <sub>50</sub> = 0.8 μM)                                                                                                               | <i>Folium sennae</i>           | (Furuta et al., 2015)                                                      |
| 18Q    |           | <i>N,N'</i> -(2,2'-(9,10-Dioxo-9,10-dihydroanthracene-2,7-diyl)bis(azanediyl)bis(2-oxo-ethane-2,1-diyl))bis(2,6-diaminohexanamide)-tetra-trifluoroacetate |   | Anti-HIV-1 (IC <sub>50</sub> = 2.12 ± 0.16 μM)                                                                                                     | Derivatives                    | (Frecentese, et al. 2016)                                                  |
| 1F     | Flavonoid | Quercetin                                                                                                                                                 |  | Anti-CDV (IC <sub>50</sub> = 11.72 ± 0.85 μg/mL)<br>Anti-HIV (IC <sub>50</sub> = 88.98 μM)<br>Anti H1N1 influenza virus (ED <sub>50</sub> = 48 μM) | Widespread in nature           | (Carvalho et al., 2013a)<br>(Pasetto et al., 2014)<br>(Thapa et al., 2012) |

| Symbol | Type      | Compound     | Structure                                                                            | Targets and effects                                                                              | Source                                | Ref.                                            |
|--------|-----------|--------------|--------------------------------------------------------------------------------------|--------------------------------------------------------------------------------------------------|---------------------------------------|-------------------------------------------------|
| 2F     | Flavonoid | Rutin        | 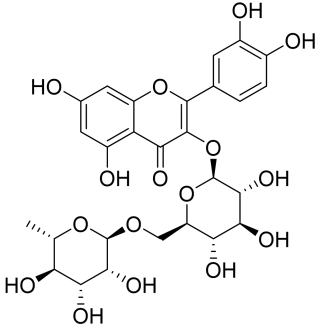   | Anti-CDV<br>(IC <sub>50</sub> = 10.41 ± 0.12 µg/mL)                                              | <i>Sophora japonica L.</i>            | (Carvalho et al., 2013a)                        |
| 3F     |           | Isoquercetin |    | Anti-H1N1 influenza virus<br>(ED <sub>50</sub> = 1.2 µM)                                         | Widespread in nature                  | (Kim et al., 2010)                              |
| 4F     |           | Baicalin     |   | Anti-CHIKV<br>(EC <sub>50</sub> = 7 µM)<br>Anti-DENV-2<br>(IC <sub>50</sub> = 13.50 µg/mL)       | <i>Scutellaria baicalensis Georgi</i> | (Oo et al., 2018)<br>(Moghaddam et al., 2014)   |
| 5F     |           | Baicalein    |  | Anti-CHIKV<br>(IC <sub>50</sub> = 1.891 µg/mL)<br>Anti-DENV-2<br>(IC <sub>50</sub> = 6.46 µg/mL) | <i>Scutellaria baicalensis Georgi</i> | (Lani et al., 2016)<br>(Moghaddam et al., 2014) |



| Symbol | Type      | Compound                          | Structure                                                                            | Targets and effects                                                                                                       | Source                                    | Ref.                                        |
|--------|-----------|-----------------------------------|--------------------------------------------------------------------------------------|---------------------------------------------------------------------------------------------------------------------------|-------------------------------------------|---------------------------------------------|
| 6F     | Flavonoid | Hesperidin                        | 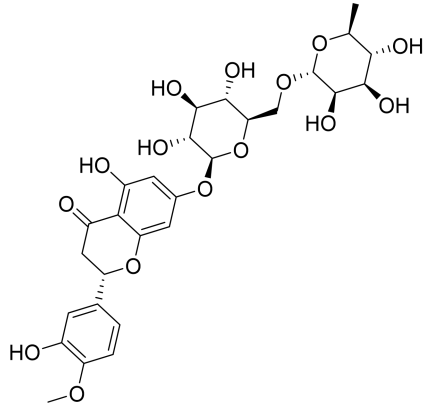   | Anti-CDV<br>(IC <sub>50</sub> = 11.09 ± 0.45 µg/mL)                                                                       | <i>Citrus reticulata</i><br><i>Blanco</i> | (Carvalho et al., 2013a)                    |
| 7F     |           | Epigallocatechin-3-gallate (EGCG) |   | Anti-HBV<br>(HBsAg inhibition: 53%,<br>HBeAg inhibition: 44%)<br>Anti-H1N1 influenza virus<br>(ED <sub>50</sub> = 8.3 µM) | <i>Camellia sinensis</i>                  | (Pang et al., 2014)<br>(Thapa et al., 2012) |
| 8F     |           | Myricetin                         |  | Anti-HIV<br>(IC <sub>50</sub> = 20.43 µM)                                                                                 | <i>Myrica rubra</i>                       | (Pasetto, et al. 2014)                      |

| Symbol | Type      | Compound                                                                          | Structure                                                                           | Targets and effects                                       | Source                     | Ref.                     |
|--------|-----------|-----------------------------------------------------------------------------------|-------------------------------------------------------------------------------------|-----------------------------------------------------------|----------------------------|--------------------------|
| 9F     | Flavonoid | Pinocembrin                                                                       | 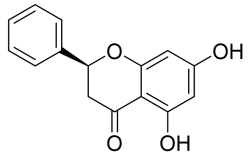 | Anti-HIV<br>(IC <sub>50</sub> = 346.75 μM)                | <i>Colla Apis</i>          | (Pasetto, et al. 2014)   |
| 10F    |           | Morin                                                                             |   | Anti-CDV<br>(IC <sub>50</sub> = 34.02 μg/mL)              | <i>Phellinus igniarius</i> | (Carvalho et al., 2013a) |
| 11F    |           | Quercetin-3-gallate                                                               |   | Anti-H1N1 influenza virus<br>(ED <sub>50</sub> = 9.1 μM)  | Widespread in nature       | (Thapa, et al. 2012)     |
| 12F    |           | 2-(3,4-Dihydroxyphenyl)-5,7-dihydroxy-4-oxo-4H-chromen-3-yl 2,5-dihydroxybenzoate |  | Anti-H1N1 influenza virus<br>(ED <sub>50</sub> = 19.4 μM) | Widespread in nature       | (Thapa, et al. 2012)     |

| Symbol | Type      | Compound                                                                              | Structure | Targets and effects                                       | Source               | Ref.                 |
|--------|-----------|---------------------------------------------------------------------------------------|-----------|-----------------------------------------------------------|----------------------|----------------------|
| 13F    | Flavonoid | 5,7-Dihydroxy-2-(3,4-dihydroxyphenyl)-4-oxo-4H-chromen-3-yl 4-hydroxy-3-aminobenzoate |           | Anti-H1N1 influenza virus<br>(ED <sub>50</sub> = 22.6 μM) | Widespread in nature | (Thapa, et al. 2012) |
| 14F    |           | 2-(3,4-Dihydroxyphenyl)-5,7-dihydroxy-4-oxo-4H-chromen-3-yl 4-amino-3-hydroxybenzoate |           | Anti-H1N1 influenza virus<br>(ED <sub>50</sub> = 24.1 μM) | Widespread in nature | (Thapa, et al. 2012) |
| 15F    |           | 2-Hydroxy-5-(3,5,7-trihydroxy-4-oxo-4H-chromen-2-yl)phenyl 3,4,5-trihydroxybenzoate   |           | Anti H1N1<br>(ED <sub>50</sub> > 50 μM)                   | Derivatives          | (Thapa, et al. 2012) |
| 16F    |           | 3,5,7-(Trihydroxy)-2-[4-hydroxy-3-(3-aminopropoxy)phenyl]-4-oxo-4H-chromene           |           | Anti H1N1<br>(ED <sub>50</sub> > 50 μM)                   | Derivatives          | (Thapa, et al. 2012) |

| Symbol | Type      | Compound                                                                                                                                                                                                                                                       | Structure                                                                            | Targets and effects                         | Source                 | Ref.                          |
|--------|-----------|----------------------------------------------------------------------------------------------------------------------------------------------------------------------------------------------------------------------------------------------------------------|--------------------------------------------------------------------------------------|---------------------------------------------|------------------------|-------------------------------|
| 17F    | Flavonoid | 3,7-(Dihydroxy)-2-(3,4-dihydroxyphenyl)-5-propyloxy-4-oxo-4H-chromene                                                                                                                                                                                          | 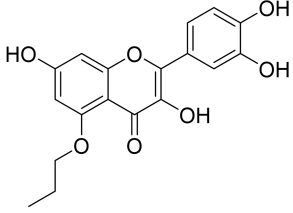   | Anti H1N1<br>(ED <sub>50</sub> > 50 μM)     | Derivatives            | (Thapa, et al. 2012)          |
| 1T     | Terpene   | Artemisinin                                                                                                                                                                                                                                                    |   | Anti-HBV<br>(IC <sub>50</sub> = 55 μmol/L)  | <i>Artemisia annua</i> | (Wohlfarth and Efferth, 2009) |
| 2T     |           | Artesunate                                                                                                                                                                                                                                                     |   | Anti-HBV<br>(IC <sub>50</sub> = 2.3 μmol/L) | Derivatives            | (Wohlfarth and Efferth, 2009) |
| 3T     |           | (1R,3aS,5aR,5bR,9S,11aR)-5a,5b,8,8,11a-pentamethyl-9-((4-oxo-4-(((3R,9R,10S,12R,12aR)-3,6,9-trimethyldecahydro-12H-3,12-epoxy[1,2]dioxepino[4,3-i]isochromen-10-yl)oxy)butanoyl)oxy)-1-(prop-1-en-2-yl)icosahydro-3aH-cyclopenta[a]chrysene-3a-carboxylic acid |  | Anti-HCMV<br>(EC <sub>50</sub> = 0.24 μM)   | Derivatives            | (Karagoz et al., 2019)        |

| Symbol | Type    | Compound        | Structure                                                                           | Targets and effects                                                                                           | Source                                                                          | Ref.                    |
|--------|---------|-----------------|-------------------------------------------------------------------------------------|---------------------------------------------------------------------------------------------------------------|---------------------------------------------------------------------------------|-------------------------|
| 4T     | Terpene | Andrographolide | 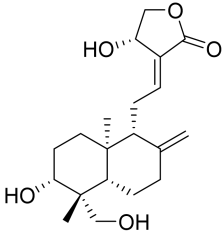 | Anti-DENV-2<br>(EC <sub>50</sub> = 21.304 μM in Hep G2 cells)<br>(EC <sub>50</sub> = 22.739 μM in HeLa cells) | <i>Andrographis paniculata</i>                                                  | (Panraksa et al., 2017) |
| 5T     |         | Phomanolide     |  | Anti-H1N1 influenza virus<br>(IC <sub>50</sub> = 2.96 ± 0.64 μg/mL)                                           | <i>Phoma</i> species isolated from the roots of <i>Aconitum vilmorinianum</i> . | (Liu et al., 2019a)     |
| 6T     |         | Xiamycin        |   | Anti-HIV (IC <sub>50</sub> > 30 μM)                                                                           | <i>Streptomyces</i> species GT2002/1503                                         | (Ding et al., 2010)     |
| 7T     |         | Celastrol       |  | Anti-HCV<br>(EC <sub>50</sub> = 0.37 ± 0.022 μM)                                                              | Root extracts of <i>Tripterygium wilfordii</i>                                  | (Tseng et al., 2017)    |

| Symbol | Type    | Compound                                                                       | Structure                                                                            | Targets and effects                             | Source                                          | Ref.                     |
|--------|---------|--------------------------------------------------------------------------------|--------------------------------------------------------------------------------------|-------------------------------------------------|-------------------------------------------------|--------------------------|
| 8T     | Terpene | 3,16-Dioxo-N-(2,3,4,6-tetra-O-acetyl-β-D-galactopyranosyl)olean-12-en-28-amide | 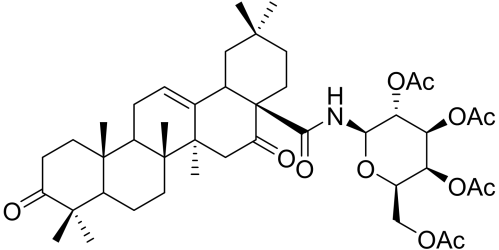   | Anti-EBOV<br>(IC <sub>50</sub> = 59.2 ± 1.6 nM) | Derivatives                                     | (Si et al., 2018)        |
| 9T     |         | Glycyrrhizin (GL)                                                              |    | Anti-HCV<br>(EC <sub>50</sub> = 16.5 μM)        | Licorice<br>( <i>Glycyrrhizae glabra</i> ) root | (Matsumoto et al., 2013) |
| 10T    |         | 3-O-(3',3'-dimethylsuccinyl)-oleanolic acid                                    |  | Anti-HIV-1<br>(EC <sub>50</sub> = 0.32 μM)      | Derivatives                                     | (Yu et al., 2006)        |

| Symbol | Type    | Compound                                                                                                          | Structure                                                                            | Targets and effects                                       | Source                                          | Ref.                 |
|--------|---------|-------------------------------------------------------------------------------------------------------------------|--------------------------------------------------------------------------------------|-----------------------------------------------------------|-------------------------------------------------|----------------------|
| 11T    | Terpene | 3, 11-Dioxo-18 $\beta$ -olean-12-en-30-oic acid                                                                   | 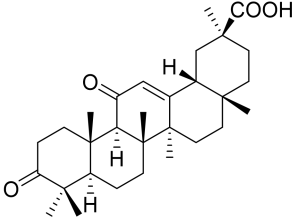   | Anti-HBV<br>(IC <sub>50</sub> = 432.54 $\mu$ M)           | Derivatives                                     | (Wang et al., 2012a) |
| 12T    |         | Glycyrrhetic acid (GA)                                                                                            |    | Anti-HBV<br>(IC <sub>50</sub> = 20.86 $\mu$ M)            | Licorice<br>( <i>Glycyrrhizae glabra</i> ) root | (Wang et al., 2012a) |
| 13T    |         | 3 $\alpha$ -O-[2,4-Di-O-( $\alpha$ -L-rhamnopyranosyl)- $\beta$ -D-glucopyranosyl]-12-en-28-oic acid methyl ester |   | Anti-H5N1<br>(IC <sub>50</sub> = 1.33 $\pm$ 0.15 $\mu$ M) | Derivatives                                     | (Song et al., 2015)  |
| 14T    |         | methyl ursolate 3-O-b-chaco-trioside                                                                              |  | Anti-H5N1<br>(IC <sub>50</sub> = 1.02 $\pm$ 0.13 $\mu$ M) | Derivatives                                     | (Song et al., 2015)  |

| Symbol | Type    | Compound                                                 | Structure                                                                            | Targets and effects                         | Source                             | Ref.                   |
|--------|---------|----------------------------------------------------------|--------------------------------------------------------------------------------------|---------------------------------------------|------------------------------------|------------------------|
| 15T    | Terpene | Ursolic acid (UA)                                        | 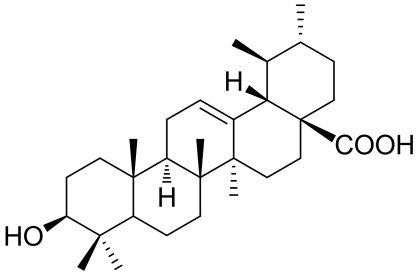   | Anti-HCV<br>(IC <sub>50</sub> = 10.6 µg/ml) | <i>Fructus Ligustri<br/>Lucidi</i> | (Kong et al.,<br>2013) |
| 16T    |         | Oleanolic acid (OA)                                      |    | Anti-HCV<br>(IC <sub>50</sub> = 2.9 µg/ml)  | <i>Fructus Ligustri<br/>Lucidi</i> | (Kong et al.,<br>2013) |
| 17T    |         | 4-Hydroxy-3, 4-seco-olean-12-en-28-oic acid 3, 4 lactone |   | Anti-HBV<br>(IC <sub>50</sub> = 0.86 µM)    | Derivatives                        | (Li et al.,<br>2018)   |
| 18T    |         | Olean-12α-hydroxy-3-ε-lacton-28-oic acid γ-lactone       |  | Anti-HBV (IC <sub>50</sub> = 149.1<br>µM)   | Derivatives                        | (Li et al.,<br>2018)   |



| Symbol | Type         | Compound                    | Structure                                                                            | Targets and effects                                                                                                                           | Source                                   | Ref.                                                               |
|--------|--------------|-----------------------------|--------------------------------------------------------------------------------------|-----------------------------------------------------------------------------------------------------------------------------------------------|------------------------------------------|--------------------------------------------------------------------|
| 1R     | Organic acid | Cis-cinnamic acid           | 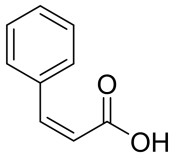  | Anti-CDV<br>(IC <sub>50</sub> = 4.46 ± 0.78 µg/mL)                                                                                            | <i>Cinnamomum cassia</i><br><i>Presl</i> | (Carvalho et al., 2013a)                                           |
| 2R     |              | Ferulic acid                |    | Anti-CDV<br>(IC <sub>50</sub> = 3.56 ± 0.13 µg/mL)                                                                                            | <i>Ferula assafoetida</i><br><i>L.</i>   | (Carvalho, et al. 2013)                                            |
| 3R     |              | <i>Trans</i> -cinnamic acid |   | Anti-CDV<br>(IC <sub>50</sub> = 23.11 ± 4.48 µg/mL)                                                                                           | <i>Cinnamomum cassia</i><br><i>Presl</i> | (Carvalho et al., 2013a)                                           |
| 4R     |              | Chlorogenic acid (CHA)      |   | Anti-H1N1<br>(EC <sub>50</sub> = 44.87 µM)<br>Anti-H3N2<br>(EC <sub>50</sub> = 62.33 µM)<br>Anti-HCoV-NL63<br>(IC <sub>50</sub> = 43.45 µM)   | <i>Lonicera japonica</i><br><i>Thunb</i> | (Ding, et al. 2017)<br>(Weng, et al. 2019)                         |
| 5R     |              | Caffeic acid (CA)           |  | Anti-HCoV-NL63<br>(IC <sub>50</sub> = 3.54 µM)<br>Anti-HCV<br>(IC <sub>50</sub> = 100 ± 20 µM)<br>Anti-SFTSV<br>(IC <sub>50</sub> = 0.048 mM) | <i>Lonicera japonica</i><br><i>Thunb</i> | (Weng et al., 2019)<br>(Shen et al., 2018)<br>(Ogawa et al., 2018) |

| Symbol | Type   | Compound         | Structure                                                                            | Targets and effects                        | Source                            | Ref.                     |
|--------|--------|------------------|--------------------------------------------------------------------------------------|--------------------------------------------|-----------------------------------|--------------------------|
| 10     | Others | Tatanan A        | 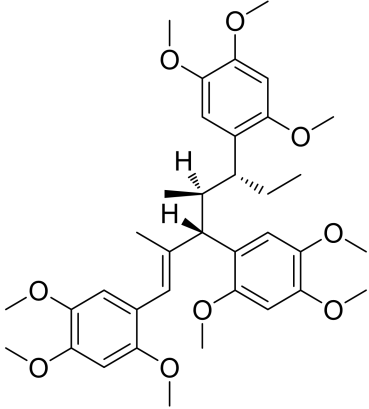   | Anti-DENV-2<br>(EC <sub>50</sub> = 3.9 μM) | <i>Acorus calamus L.</i><br>roots | (Yao, et al.<br>2018)    |
| 20     |        | Manassantin B    |    | Anti-EBV (EC <sub>50</sub> = 1.72 μM)      | <i>Saururus chinensis</i> roots   | (Cui, et al.<br>2014)    |
| 30     |        | Lutein           |   | Anti-HBV (HBsAg < 60%)                     | Widespread in nature              | (Pang, et al.<br>2010)   |
| 40     |        | Pyropheophorbide |  | Anti-HCV (IC <sub>50</sub> = 0.2 μg/mL)    | <i>M. citrifolia</i>              | (Ratnoglik et al., 2014) |

| Symbol | Type           | Compound                                    | Structure                                                                           | Targets and effects                                                                                    | Source                                         | Ref.                                         |
|--------|----------------|---------------------------------------------|-------------------------------------------------------------------------------------|--------------------------------------------------------------------------------------------------------|------------------------------------------------|----------------------------------------------|
| 5O     | Others         | Diosgenin (3 $\beta$ -hydroxy-5-spirostene) | 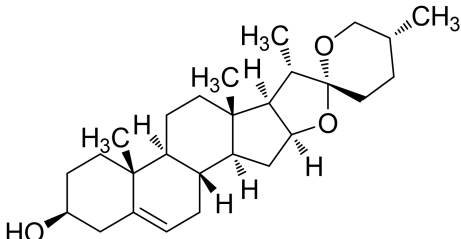  | Anti-HCV (EC <sub>50</sub> = 3.8 $\mu$ M)                                                              | <i>Dioscorea zingiberensis</i><br>C. H. Wright | (Wang et al., 2011b)                         |
| 1P     | Polysaccharide | Arabinoxylan                                |   | Anti-HSV-1<br>(IC <sub>50</sub> = 11.5 $\mu$ g/mL)                                                     | <i>Plantago ovata</i><br>seed husk             | (Mukherjee, et al. 2021)                     |
| 2P     |                | Arabinoxylan sulfates                       |   | Anti-HSV-1<br>(IC <sub>50</sub> = 2.9 $\mu$ g/mL)                                                      | <i>Plantago ovata</i><br>seed husk             | (Mukherjee, et al. 2021)                     |
| 3P     |                | Kappa carrageenan                           |  | Anti-EV71<br>(plaque reduction >60%)<br>Anti-SARS-CoV-2<br>(IC <sub>50</sub> = 37 $\pm$ 20 $\mu$ g/mL) | Marine red alga<br><i>Halymenia durvillei</i>  | (Chiu, et al. 2012)<br>(Schutz, et al. 2021) |
